# Supplementary material for: Combined Management of Groundwater Resources and Water Supply Systems at Basin Scale Under Climate Change
Source: Springer Nature journal article supplement (doi:10.1007/s11269-022-03059-7), 2022-01-25
Supplement: MOESM1 [file 20065152]

## Supplementary Tables

**Table S1** Features of the main rivers in the study area

| River     | Basin (km <sup>2</sup> ) | Altitude (m) | Baseflow (m <sup>3</sup> /s) |
|-----------|--------------------------|--------------|------------------------------|
| Enza      | 430                      | 231          | 0.90                         |
| Parma     | 111                      | 529          | 0.38                         |
| Crostolo  | 86                       | 126          | 0.19                         |
| Rio Zolle | 5                        | 200          | 0.01                         |
| Masdone   | 12                       | 200          | 0.01                         |
| Termina   | 65                       | 200          | 0.10                         |

**Table S2** Hydrogeological parameters obtained from pumping tests in the main well field.

| Well field    | $T$ (m <sup>2</sup> /s) | Thickness (m) | $K$ (m/s) | Aquifer Group |
|---------------|-------------------------|---------------|-----------|---------------|
| Bellarosa     | 3.56E-02                | 129           | 2.76E-04  | A             |
| S. Ilario     | 1.70E-02                | 108           | 1.57E-04  | A             |
| Caprara       | 2.27E-02                | 180           | 1.26E-04  | A             |
| Roncocesi     | 1.91E-02                | 195           | 9.81E-05  | A             |
| Caneparini    | 1.00E-02                | 107           | 9.35E-05  | A             |
| Case Corti    | 2.20E-02                | 104           | 2.12E-04  | A             |
| Quercioli (1) | 9.00E-03                | 111           | 8.14E-05  | A             |
| Quercioli (2) | 1.00E-04                | 50            | 2.00E-06  | B             |
| Mangalana     | 3.90E-03                | 21            | 1.86E-04  | B             |
| Aiola         | 6.62E-03                | 56            | 1.18E-04  | B             |
| Malamassata   | 5.10E-03                | 53            | 9.62E-05  | B             |

**Table S3** Irrigation withdrawals (Mm<sup>3</sup>/y) in Reggio Emilia Province, from 2002 to 2012

|    | 2002 | 2003 | 2004 | 2005 | 2006 | 2007 | 2008 | 2009 | 2010 | 2011 |
|----|------|------|------|------|------|------|------|------|------|------|
| RE | 21.5 | 57   | 27.1 | 51.4 | 35.9 | 34.2 | 23.7 | 31.3 | 18.9 | 36   |

**Table S4** Withdrawals (Mm<sup>3</sup>/y) for different uses from Enza alluvial fan, in 2010

| ID                 | Groundwater body        | Civil | Industrial | Irrigation | Zootechnical |
|--------------------|-------------------------|-------|------------|------------|--------------|
| IT080090ER-DQ1-CL  | Enza phreatic aq.       | 2.6   | 1.2        | 8.6        | 0.5          |
| IT080370ER-DQ2-CCS | Enza upper confined aq. | 8.7   | 0.4        | 3.4        | 0.4          |
| IT082370ER-DQ2-CCI | Enza lower confined aq. | 16.7  | 0.3        | 4.8        | 0.1          |

**Table S5** Projections to 2100 of climate indicators for Reggio Emilia (RCP4.5 scenario)

| Indicators           | RCP4.5                                                                              |
|----------------------|-------------------------------------------------------------------------------------|
| Average annual Tmax  | + 0.2°C/decade                                                                      |
| Average annual Tmin  | + 0.2°C/decade                                                                      |
| Extreme Tmax         | Tmax >30°C (34 more days)<br>Tmax >35°C (32 more days)<br>Tmax >40°C (11 more days) |
| Extreme Tmin (>20°C) | 40 more days                                                                        |
| Annual rainfall      | -7.9 mm/decade                                                                      |

**Table S6** Vertical discretization of the model

| Layer | Group   | Top layer                     | Bottom layer                           |
|-------|---------|-------------------------------|----------------------------------------|
| 1     | A0 + A1 | Digital Elevation Model (DEM) | DEM – (Thickness Group A)/2            |
| 2     | A2      | Bottom layer 1                | Bottom layer 1 - (Thickness Group A)/4 |
| 3     | A3 + A4 | Bottom layer 2                | Bottom layer 2 - (Thickness Group A)/4 |
| 4     | B       | Bottom layer 3                | Bottom Group B                         |

**Table S7** Summary of stress packages and parameters in groundwater model

| Forcers – Stress package            | Parameters                                                                        |
|-------------------------------------|-----------------------------------------------------------------------------------|
| Rivers – STREAM (STR)               | Conductance (m <sup>2</sup> /s), Hydraulic head (m), Baseflow (m <sup>3</sup> /s) |
| “Fontanili” (springs) – DRAIN (DRN) | Conductance per unit length (m <sup>2</sup> /s), Hydraulic head (m)               |
| Recharge – RECHARGE (RCH)           | Recharge rate (m/s)                                                               |
| Withdrawals – WELL (WEL)            | Pumping rate (m <sup>3</sup> /s) for each layer                                   |

**Table S8** Features of STR package

| Parameters                      | Values                                                                                                                                                                                                                                                                                                                                                                                                                                                                   |
|---------------------------------|--------------------------------------------------------------------------------------------------------------------------------------------------------------------------------------------------------------------------------------------------------------------------------------------------------------------------------------------------------------------------------------------------------------------------------------------------------------------------|
| Head Stream (m)                 | Digital Elevation Model (DEM)                                                                                                                                                                                                                                                                                                                                                                                                                                            |
| Streambed bottom (m)            | DEM – 2 m                                                                                                                                                                                                                                                                                                                                                                                                                                                                |
| Streambed top (m)               | DEM – 1 m                                                                                                                                                                                                                                                                                                                                                                                                                                                                |
| Outflow segment                 | Branch into which more tributaries converge<br>Enza river (branch 1) 0.4 m <sup>3</sup> /s; Parma river (branch 8) 0.19 m <sup>3</sup> /s; Crostolo river (branch 12) 0.10 m <sup>3</sup> /s; Rio Zolle (branch 6), Masdone (branch 4), and Quaresimo (branch 10) 0.01 m <sup>3</sup> /s; Termina (branch 2) 0.10 m <sup>3</sup> /s; Modolena (branch 9) 0.05 m <sup>3</sup> /s; Enza Canal: (branch 14) 0.4 m <sup>3</sup> /s, (branches 15 and 16) 0 m <sup>3</sup> /s |
| Flow (m <sup>3</sup> /s)        |                                                                                                                                                                                                                                                                                                                                                                                                                                                                          |
| Conductance (m <sup>2</sup> /s) | $k_{vert}$ with option "calculated per unit of length or area"                                                                                                                                                                                                                                                                                                                                                                                                           |

**Table S9** Average withdrawals (m<sup>3</sup>/s) of the well fields in Reggio Emilia Province

| Well field | Layer | Row | Column | $Q_i$ (m <sup>3</sup> /s) | $Q_{tot}$ (m <sup>3</sup> /s) |
|------------|-------|-----|--------|---------------------------|-------------------------------|
| Bellarosa  | 1     | 55  | 65     | 1.15E-02                  | 0.0230                        |
|            | 2     | 55  | 65     | 5.75E-03                  |                               |
|            | 3     | 55  | 65     | 5.75E-03                  |                               |
| Gazzaro    | 1     | 57  | 54     | 4.17E-03                  | 0.009                         |
|            | 2     | 57  | 54     | 2.09E-03                  |                               |
|            | 3     | 57  | 54     | 2.09E-03                  |                               |
|            | 4     | 57  | 54     | 6.53E-04                  |                               |
| Cabina Gas | 1     | 54  | 54     | 2.30E-04                  | 0.0005                        |
|            | 2     | 54  | 54     | 1.15E-04                  |                               |
|            | 3     | 54  | 54     | 1.15E-04                  |                               |
| Pensile    | 4     | 52  | 55     | 6.00E-03                  | 0.006                         |
| Caprara    | 1     | 47  | 70     | 5.00E-02                  | 0.1                           |
|            | 2     | 47  | 70     | 2.50E-02                  |                               |
|            | 3     | 47  | 70     | 2.50E-02                  |                               |
| Roncocesi  | 1     | 61  | 93     | 1.08E-01                  | 0.2160                        |
|            | 2     | 61  | 93     | 5.40E-02                  |                               |
|            | 3     | 61  | 93     | 5.40E-02                  |                               |

| Well field     | Layer | Row | Column | $Q_i$ (m <sup>3</sup> /s) | $Q_{tot}$ (m <sup>3</sup> /s) |
|----------------|-------|-----|--------|---------------------------|-------------------------------|
| Quercioli      | 1     | 69  | 77     | 1.19E-01                  | 0.2720                        |
|                | 2     | 69  | 77     | 5.95E-02                  |                               |
|                | 3     | 69  | 77     | 5.95E-02                  |                               |
|                | 4     | 69  | 77     | 3.42E-02                  |                               |
| Case Corti     | 1     | 75  | 88     | 2.97E-02                  | 0.068                         |
|                | 2     | 75  | 88     | 1.49E-02                  |                               |
|                | 3     | 75  | 88     | 1.49E-02                  |                               |
|                | 4     | 75  | 88     | 8.55E-03                  |                               |
| S.Ilario nuovo | 1     | 57  | 59     | 6.25E-02                  | 0.125                         |
|                | 2     | 57  | 59     | 3.13E-02                  |                               |
|                | 3     | 57  | 59     | 3.13E-02                  |                               |
| Caneparini     | 1     | 76  | 85     | 1.75E-02                  | 0.04                          |
|                | 2     | 76  | 85     | 8.74E-03                  |                               |
|                | 3     | 76  | 85     | 8.74E-03                  |                               |
|                | 4     | 76  | 85     | 5.03E-03                  |                               |
| Aiola          | 4     | 71  | 65     | 3.60E-02                  | 0.036                         |
| Malamassata    | 4     | 90  | 61     | 2.00E-03                  | 0.02                          |
| Mangalana      | 4     | 101 | 73     | 1.40E-02                  | 0.014                         |
| Rubbiano       | 4     | 102 | 82     | 8.00E-03                  | 0.008                         |

**Table S10** Average irrigation and industrial withdrawals  $Q_{irr\_ind}$  (m<sup>3</sup>/s) in the active area, by layer and cells

| Layer | $Q_{irr\_ind,i}$ (m <sup>3</sup> /s) | Cells (n°) | $Q_{cell,i}$ (m <sup>3</sup> /s) |
|-------|--------------------------------------|------------|----------------------------------|
| 1     | 0.2                                  | 3,990      | 5.02E-05                         |
| 2     | 0.2                                  | 3,990      | 5.02E-05                         |
| 3     | 0.2                                  | 1,900      | 1.05E-04                         |
| 4     | 0.2                                  | 2,142      | 9.34E-05                         |

**Table S11** Average baseflows in ST1 over the 30-year time horizon (2020-2050)

| Rivers      | Baseflow RCP4.5 (m <sup>3</sup> /s) |
|-------------|-------------------------------------|
| Parma       | 0.360                               |
| Enza        | 0.383                               |
| Crostolo    | 0.176                               |
| Termina     | 0.095                               |
| Masdone     | 0.010                               |
| Rio Zolle   | 0.010                               |
| Modolena    | 0.048                               |
| Quaresimo   | 0.010                               |
| Canale Enza | 0.383                               |

**Table S12** Flow max amount (MI/day) extracted from well fields

| Well fields    | Flow Max Amount (MI/day) |
|----------------|--------------------------|
| Pump_Bellarosa | 3.36                     |
| Pump_Gazzaro   | 1.04                     |
| Pump_CabinaGas | 0.14                     |

| Well fields          | Flow Max Amount (MI/day) |
|----------------------|--------------------------|
| Pump_Pensile         | 1.90                     |
| Pump_Caprara         | 9.57                     |
| Pump_Roncocesi       | 23.84                    |
| Pump_Quercioli       | 31.91                    |
| Pump_Case Corti      | 10.76                    |
| Pump_S. Ilario Nuovo | 15.13                    |
| Pump_Caneparini      | 5.15                     |
| Pump_Aiola           | 3.75                     |
| Pump_Malamassata     | 1.23                     |
| Pump_Mangalana       | 3.40                     |
| Pump_Rubbianino      | 1.81                     |
| Pump_Parma           | 35.22                    |

**Table S13** Water deficit (Mm<sup>3</sup>) as a function of Surplus demand for different RV2 volumes and BAURV2 and ST2 scenarios

| RV2 Volume (Mm <sup>3</sup> ) | Deficit (Mm <sup>3</sup> ) |      |               |      |               |      |                |       |
|-------------------------------|----------------------------|------|---------------|------|---------------|------|----------------|-------|
|                               | Surplus                    |      | Surplus + 25% |      | Surplus + 50% |      | Surplus + 100% |       |
|                               | BAURV2                     | ST2  | BAURV2        | ST2  | BAURV2        | ST2  | BAURV2         | ST2   |
| 10                            | 11.2                       | 17.0 | 25.9          | 36.7 | 48.4          | 62.3 | 104.4          | 131.5 |
| 15                            | 3.3                        | 5.7  | 8.6           | 14.1 | 20.9          | 29.9 | 64.3           | 83.7  |
| 20                            | 0                          | 0.7  | 3.6           | 6.5  | 9.3           | 13.5 | 33.6           | 48.9  |
| 25                            | 0                          | 0    | 0             | 1.5  | 4.3           | 7.2  | 18.7           | 25.0  |
| 30                            | 0                          | 0    | 0             | 0    | 0             | 2.2  | 10.9           | 14.3  |
| 35                            | 0                          | 0    | 0             | 0    | 0             | 0    | 5.9            | 8.8   |
| 40                            | 0                          | 0    | 0             | 0    | 0             | 0    | 0.9            | 3.8   |
| 45                            | 0                          | 0    | 0             | 0    | 0             | 0    | 0              | 0     |
| 50                            | 0                          | 0    | 0             | 0    | 0             | 0    | 0              | 0     |

**Table S14** Number of days in a decade when the Enza MVF is released from the RV2 reservoir, and corresponding percentage (BAURV2 and ST2)

|        | MVF days      |               |               |                |
|--------|---------------|---------------|---------------|----------------|
|        | Surplus       | Surplus + 25% | Surplus + 50% | Surplus + 100% |
| BAURV2 | 1,321 (36.2%) | 1,543 (42.3%) | 1,686 (46.2%) | 2,040 (55.9%)  |
| ST2    | 1,554 (42.6%) | 1,756 (48.1%) | 1,948 (53.4%) | 2,251 (61.7%)  |

## Supplementary Figures

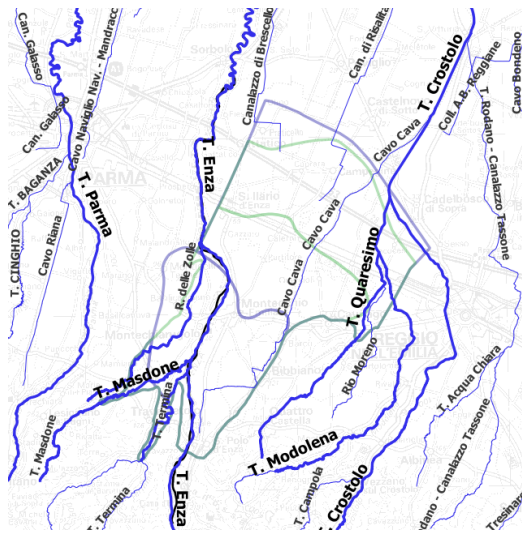

**Fig. S1** Rivers in the study area

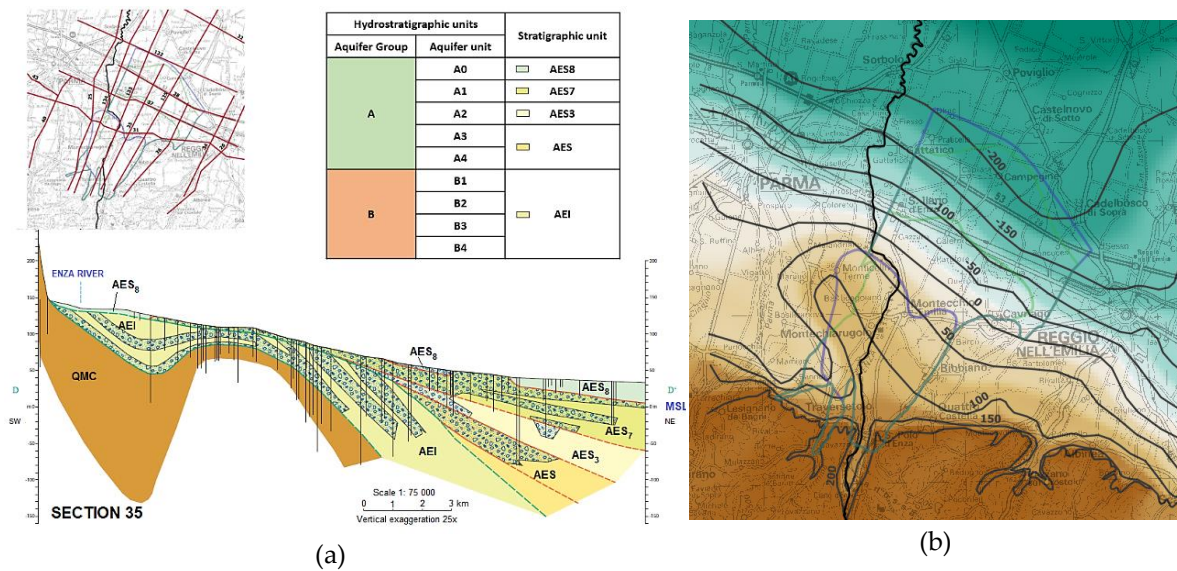

**Fig. S2** (a) Geological sections in the study area, with focus on Section 35 and correspondence among Aquifer Unit and Stratigraphic Unit; (b) Reconstruction of Aquifer Group A base.

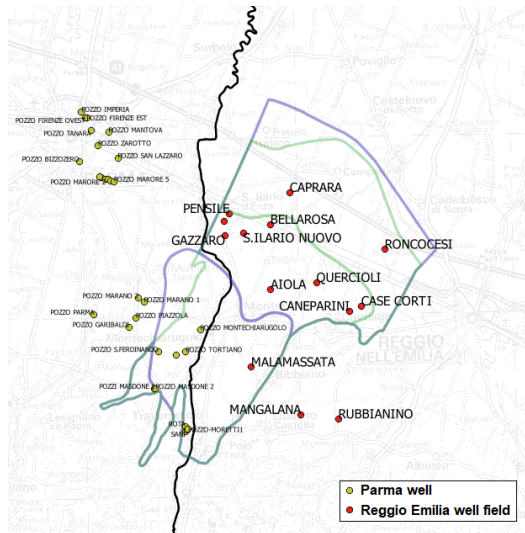

Fig. S3 Location of Reggio Emilia well fields and Parma wells

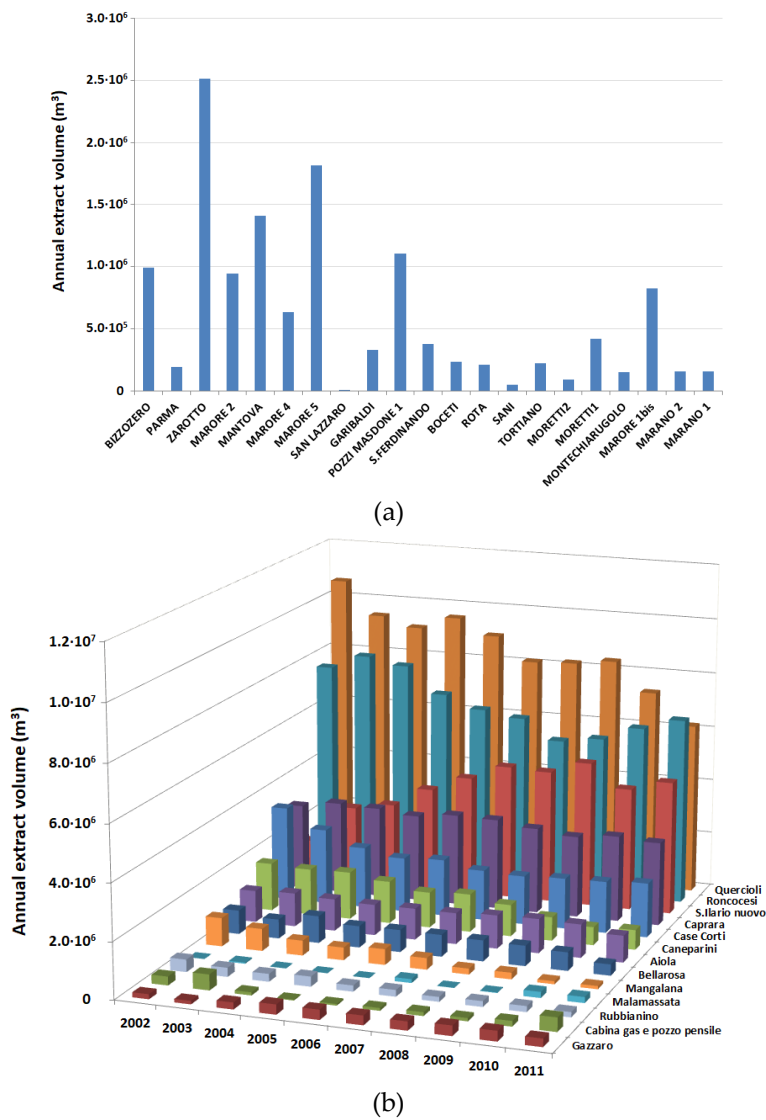

Fig. S4 (a) Annual average volume extracted from Parma wells; (b) Annual extract volume from Reggio Emilia well fields, from 2002 to 2012

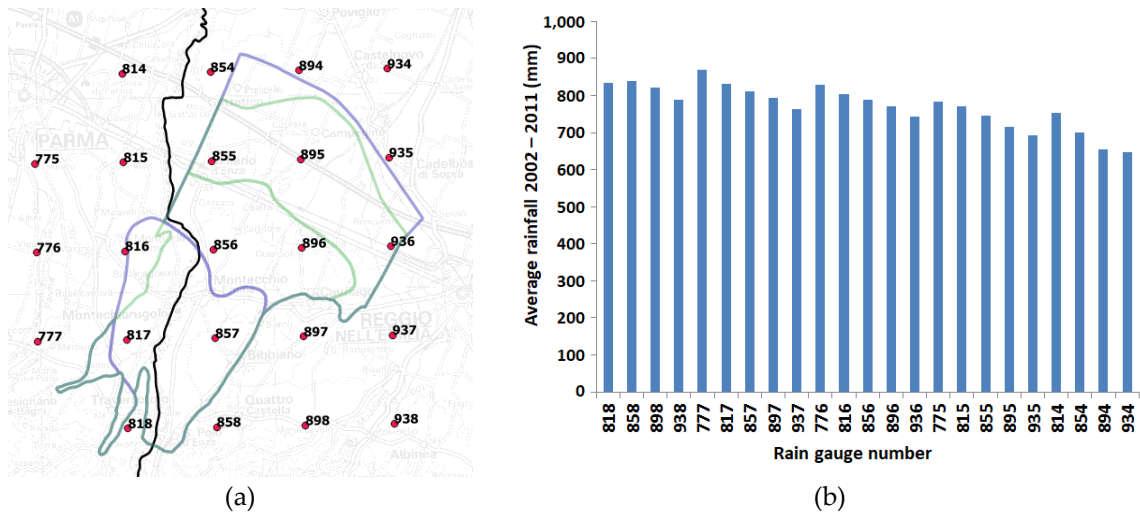

**Fig. S5** (a) Rain gauges location in the study area; (b) Average rainfall in 2002-2012 decade at each rain gauge

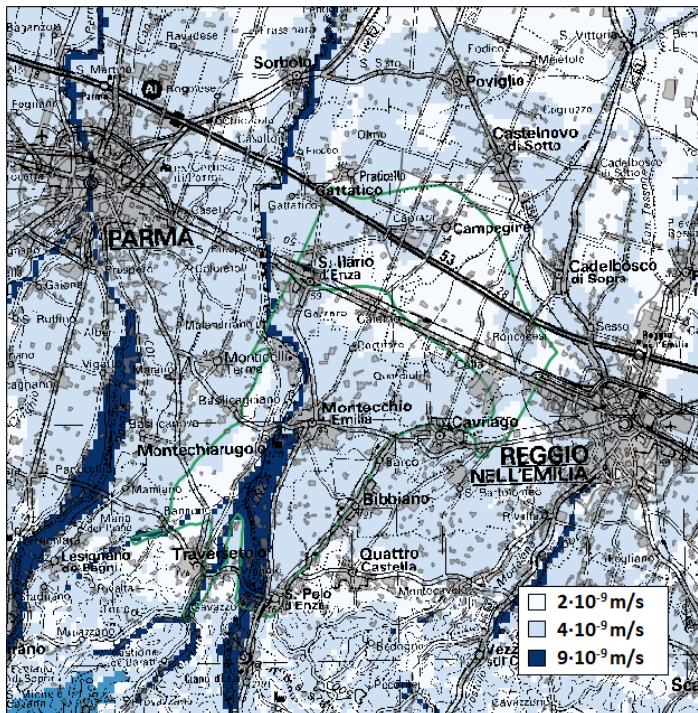

**Fig. S6** Distribution of recharge rate by soil type (urban impermeable areas in grey).



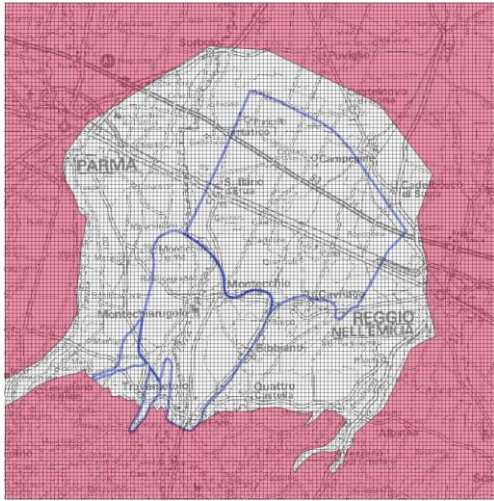

(a)

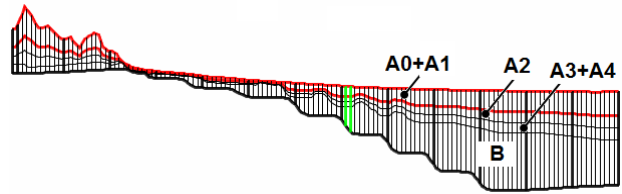

(b)

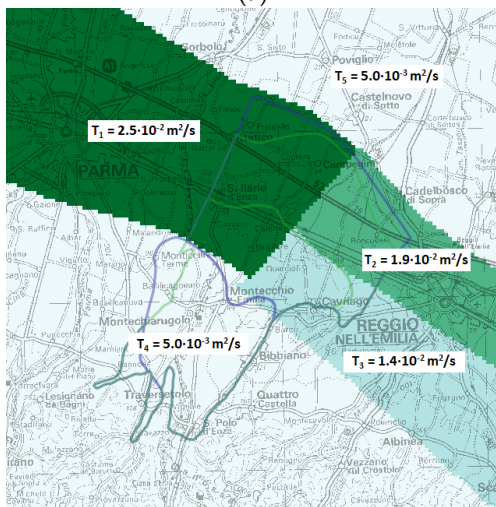

(c)

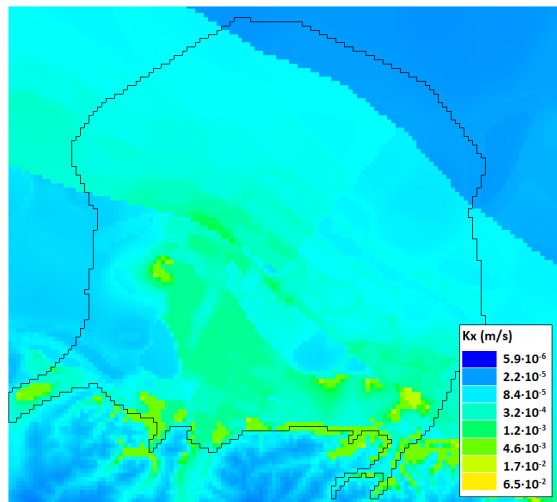

(d)

**Fig. S7** (a) Active area of the model (white area); (b) Vertical schematization of the model; (c) Transmissivity distribution ( $\text{m}^2/\text{s}$ ), for aquifer Group A; (d)  $k_{hor}$  distribution for the first three layers.

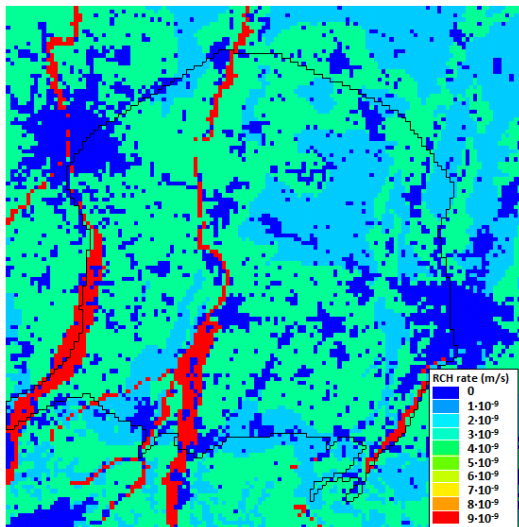

(a)

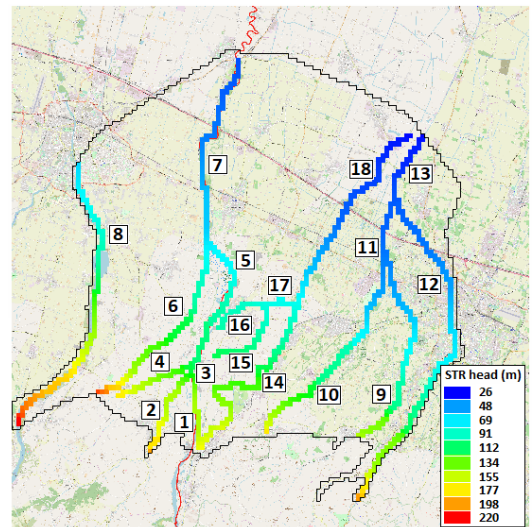

(b)



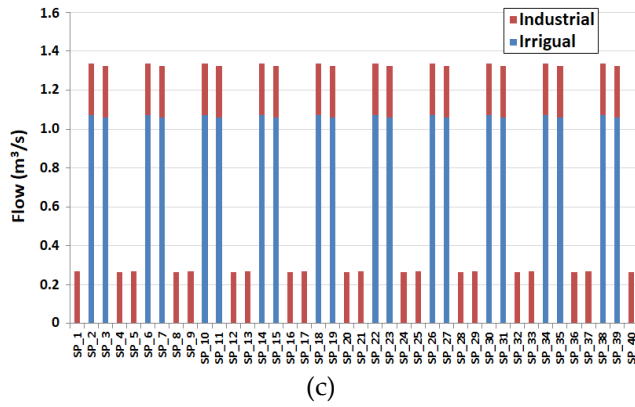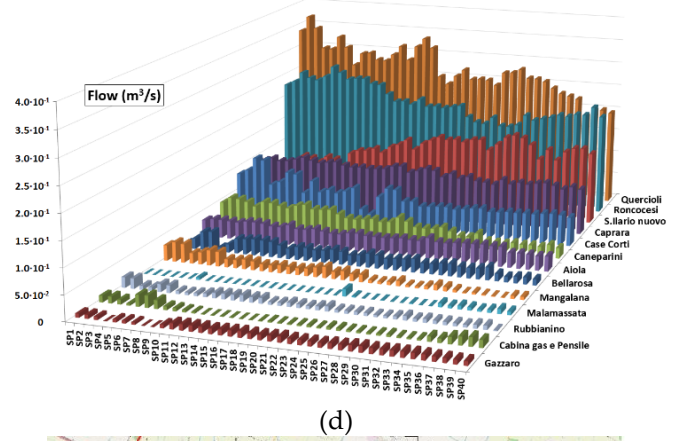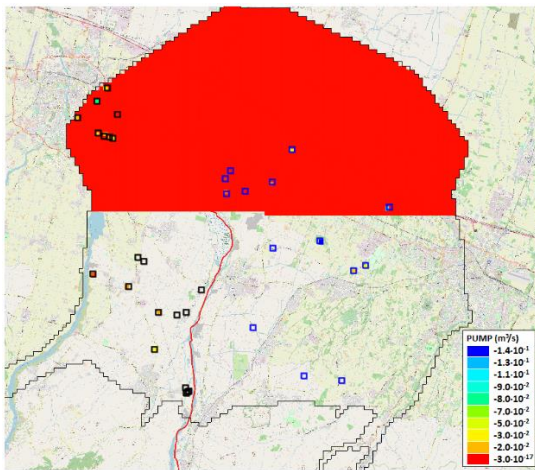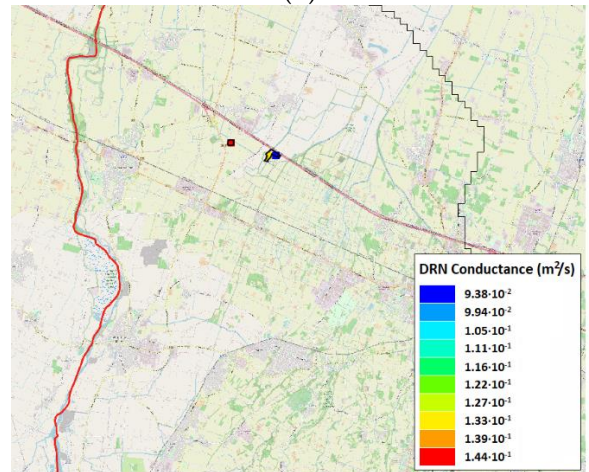

**Fig. S8** (a) Effective recharge rate; (b) Hydrographic network, with hydraulic head and hierarchy of rivers; (c) Irrigation/industrial and (d) civil withdrawals from the well fields of Reggio Emilia Province, over the 2002-2012 period; (e) Civil (blue and black squares) and irrigation/industrial (red) withdrawals; (f) “Fontanili” inserted in the model

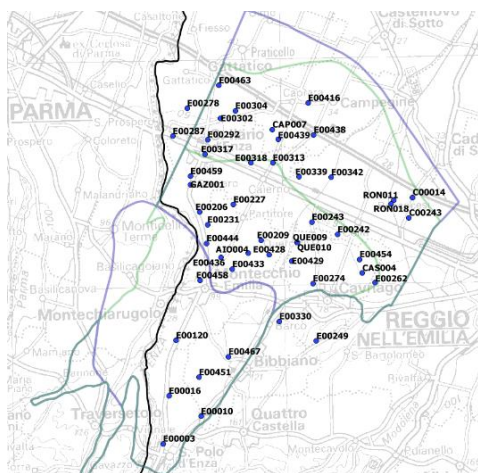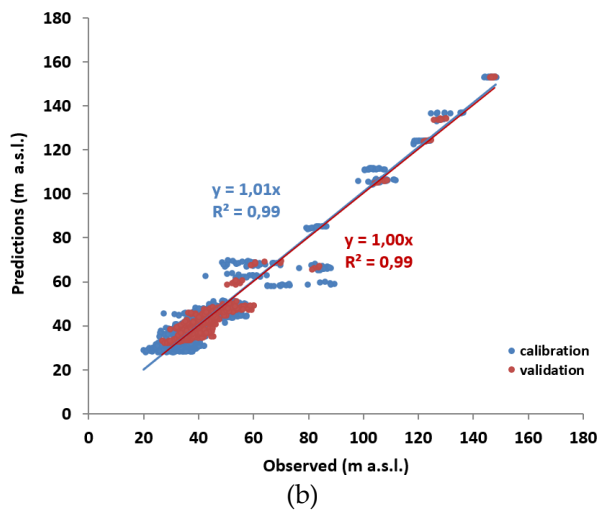

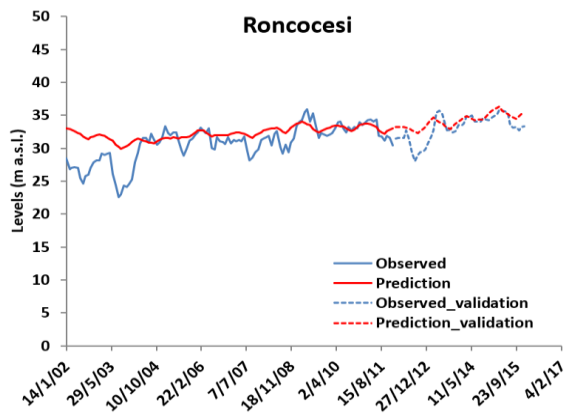

(c)

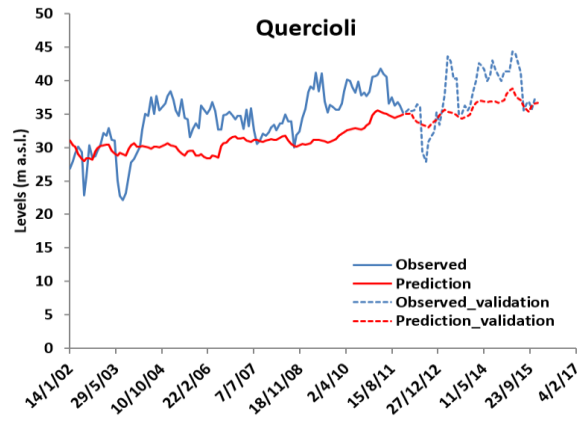

(d)

**Fig. S9** (a) Location of wells (water company and private) used for calibration and validation; (b) Observed values vs. predictions; (c) - (d) Trend of observed vs. predicted levels in calibration and validation, for Roncocesi and Quercioli wells

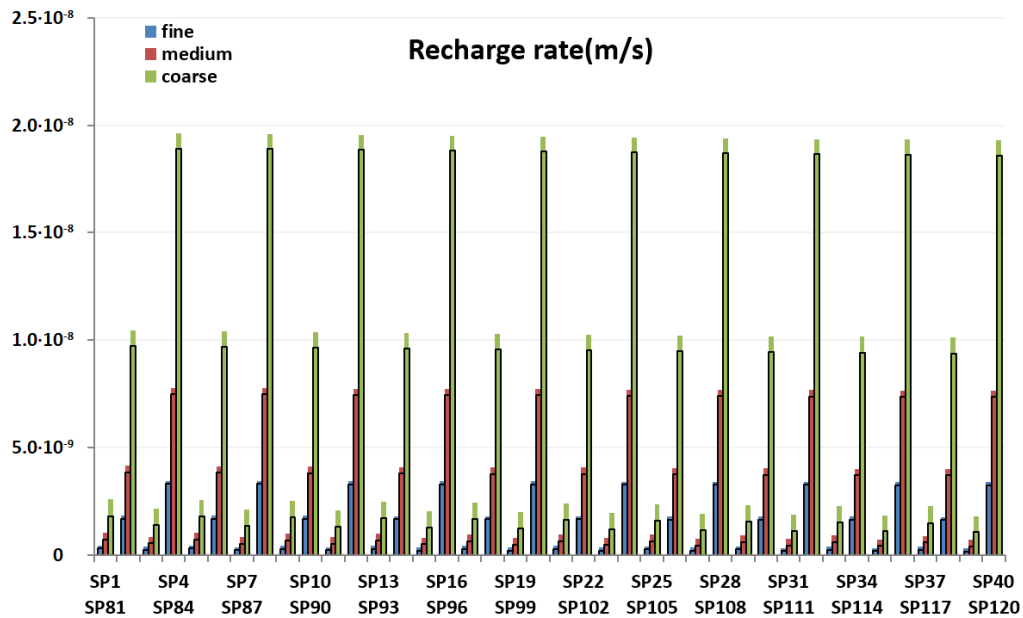

**Fig. S10** Recharge rate (m/s) for different soil types, for the first (SP1 - SP40) and last (SP81 - SP120) decade of 30-year time horizon, in ST1 model. The histogram of the decade SP81 - SP120 has black borders

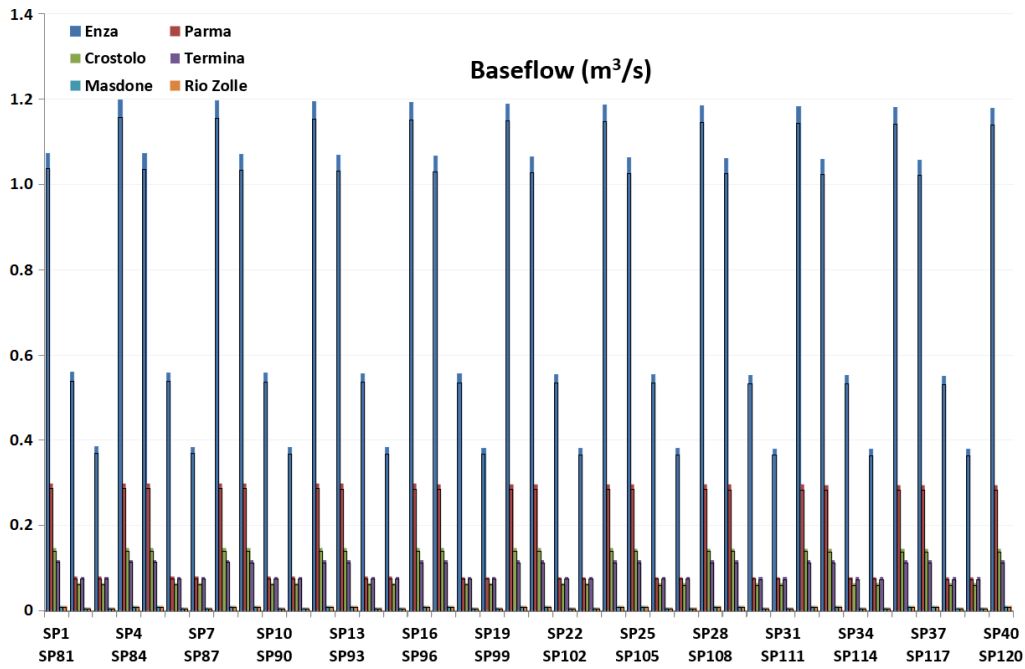

**Fig. S11** Baseflow ( $m^3/s$ ) of main rivers in the ST1 model, and for the first (SP1 - SP40) and last (SP81 - SP120) decade of 30-year time horizon. The histogram of the decade SP81 - SP120 has black borders

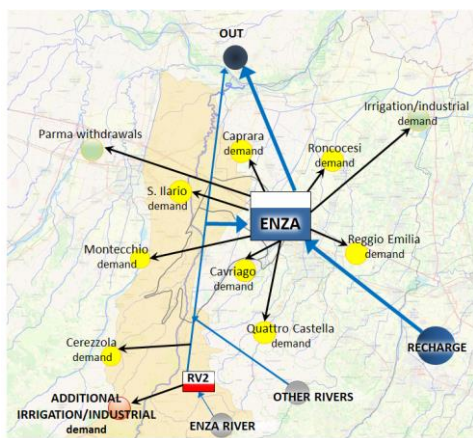

(a)

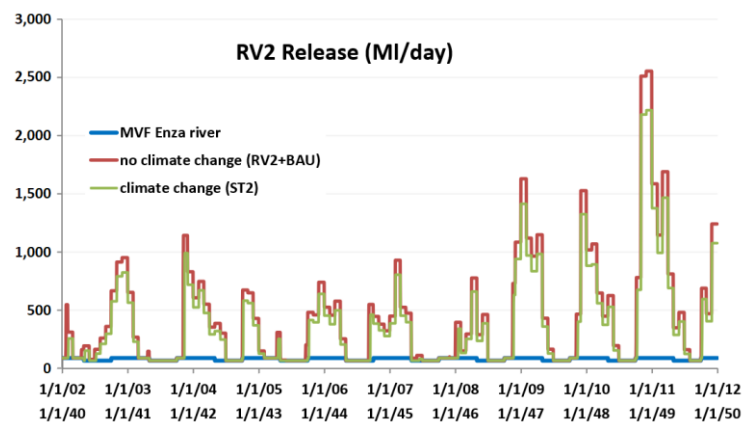

(b)

**Fig. S12** (a) Schematization of water supply network; (b) Release from RV2, with and without climate changes, compared with Enza's MVF.

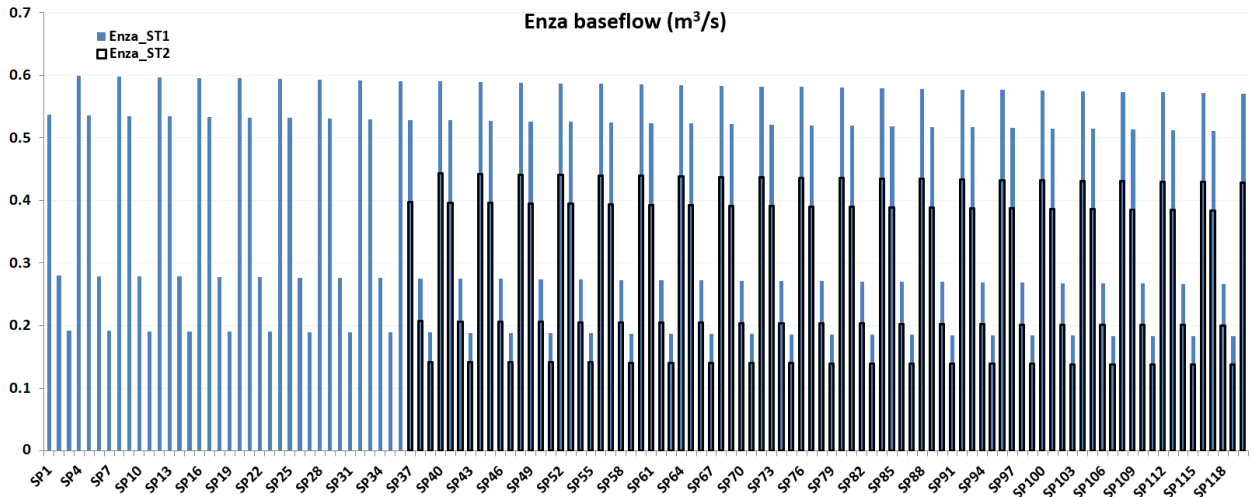

**Fig. S13** Comparison between Enza baseflow in ST1 and ST2

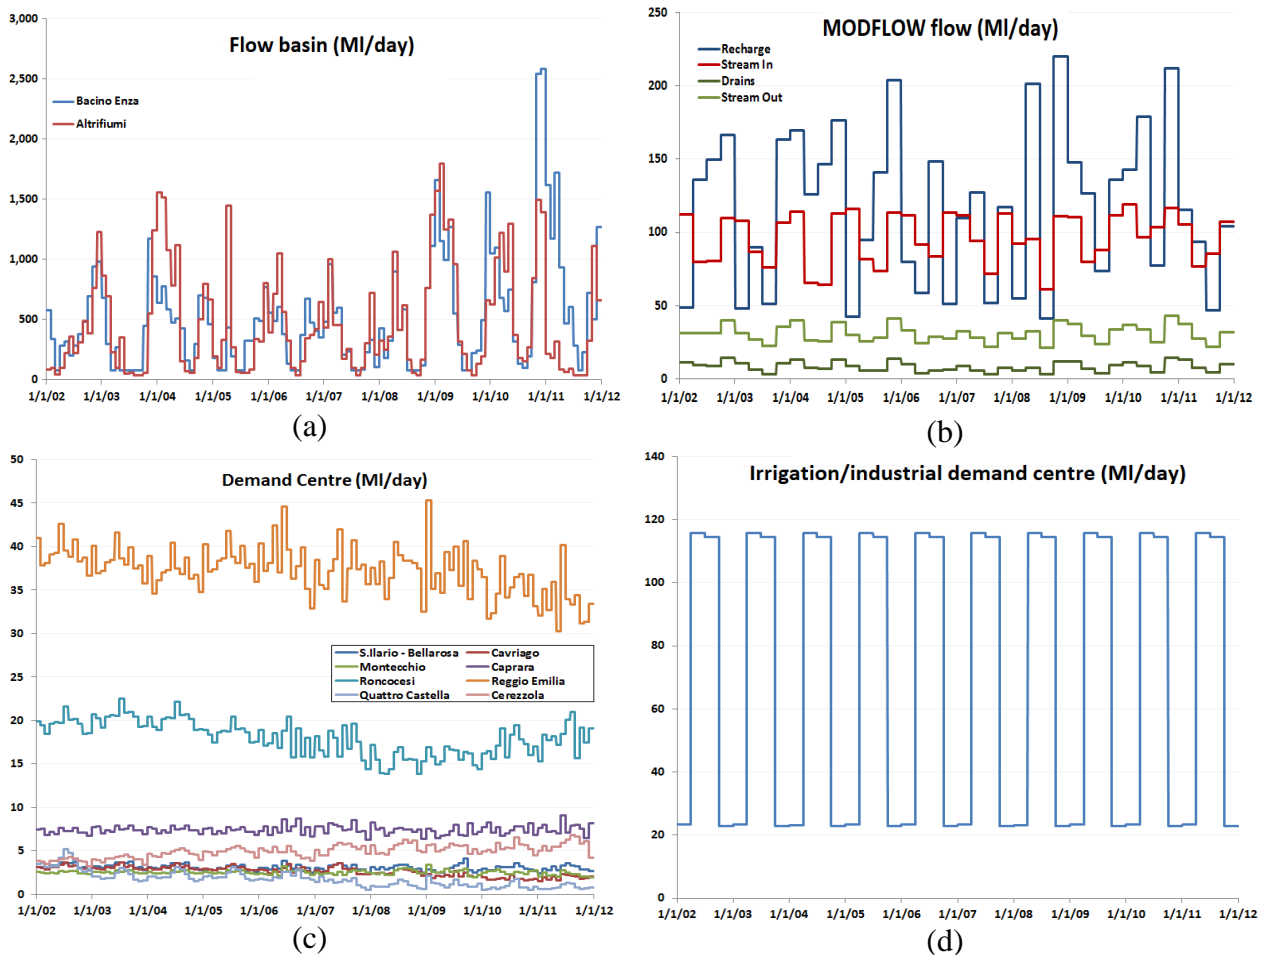

**Fig. S14** (a) Surface water flows for Enza basin and Altrifumi, in the 2002-2012 period; (b) Flow time series derived by BAU (MODFLOW); (c) Flow time series associated with the demand centers served by the well fields in of Reggio Emilia Province; (d) Time series of irrigation and industrial withdrawals.



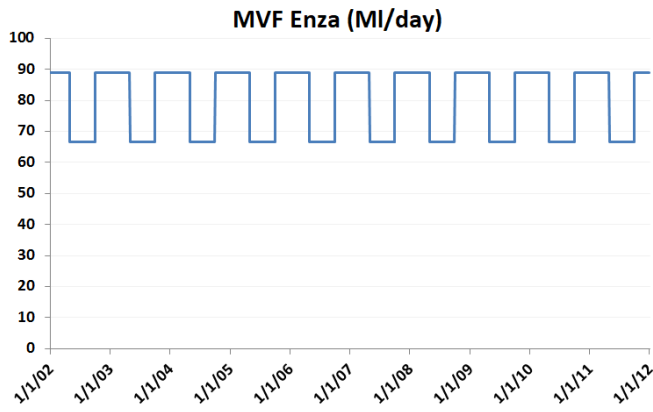

**Fig. S15** Daily time series of Enza MVF

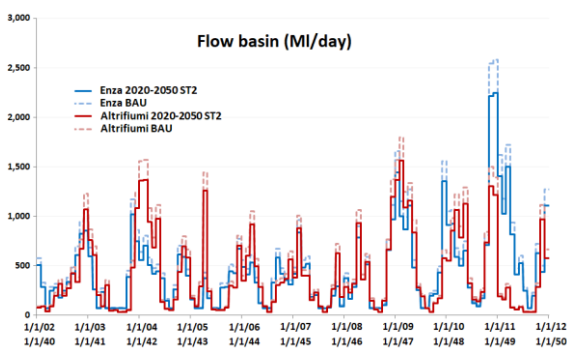

(a)

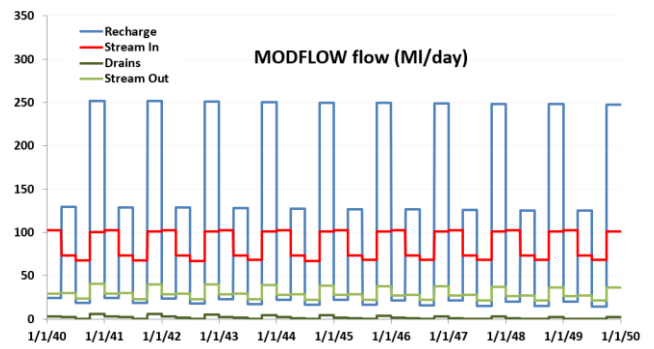

(b)

**Fig. S16** (a) Flow from Enza basin and Altrifiumi, for ST2 and BAU simulation; (b) Flow time series derived by ST2 (MODFLOW)

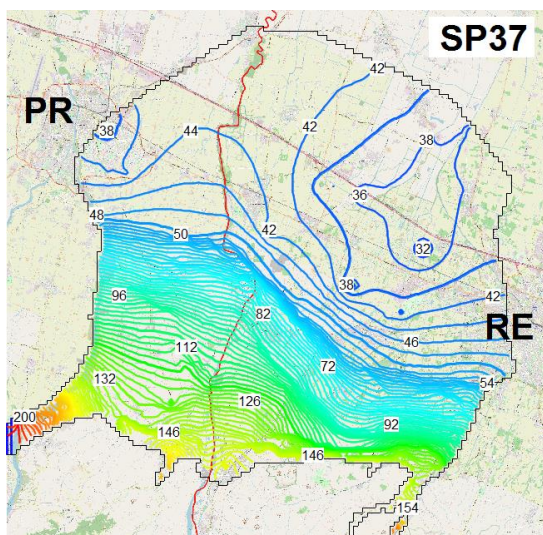

(a)

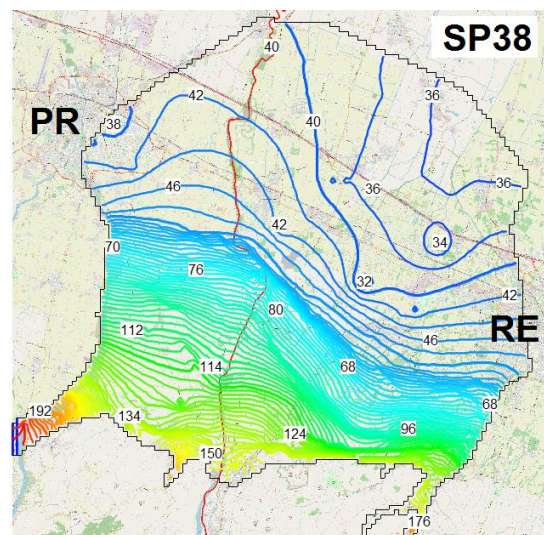

(b)

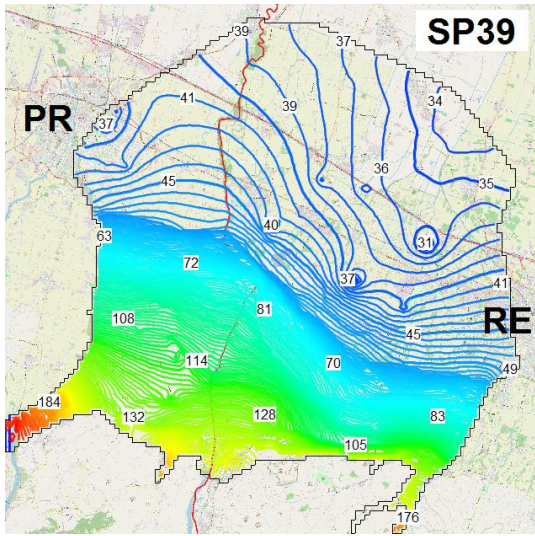

(c)

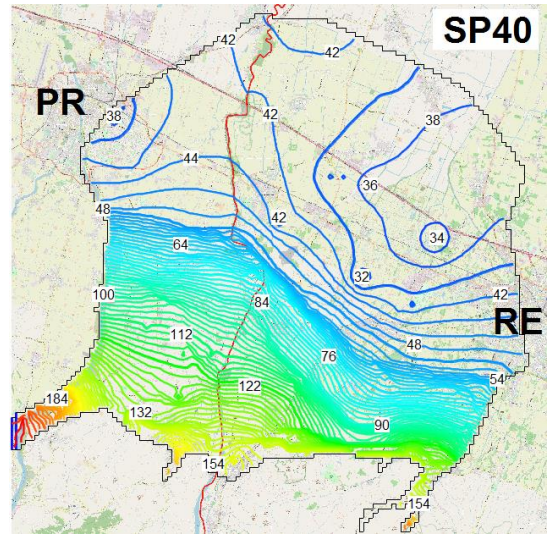

(d)

**Fig. S17** (a) – (d) Hydraulic head within layer 1, BAU scenario, last year of simulation (2011)

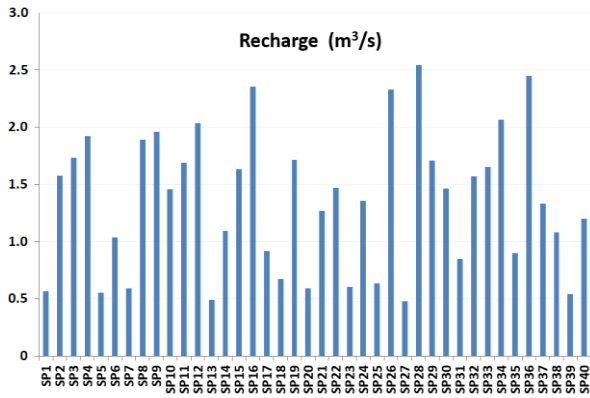

(a)

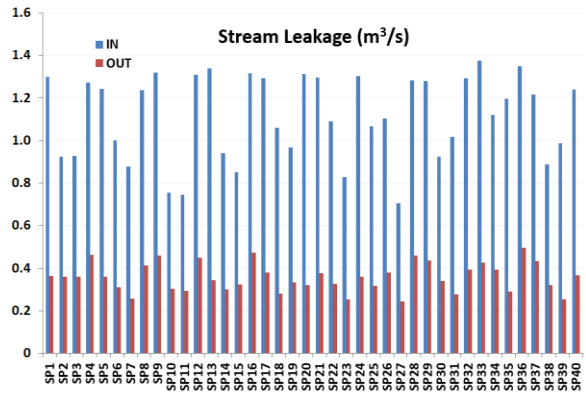

(b)

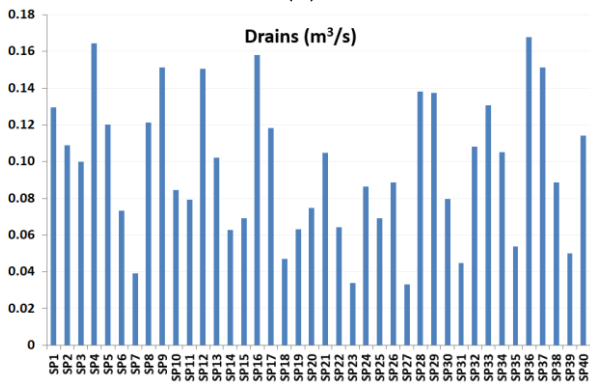

(c)

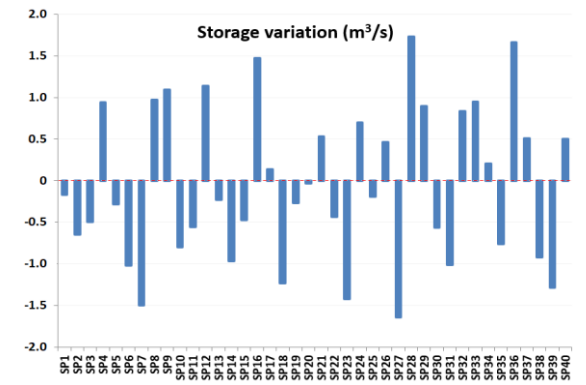

(d)



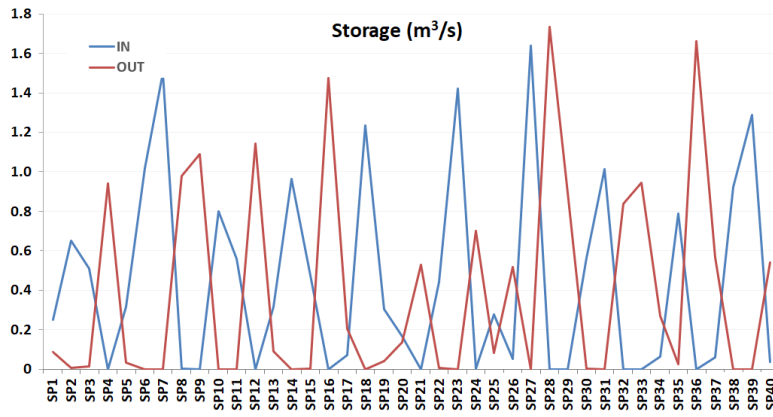

(e)

**Fig. S18** (a) – (e) Volumetric budget, derived by BAU model: Recharge, Stream leakage In/Out, Drains, Storage variation, and Storage In/Out

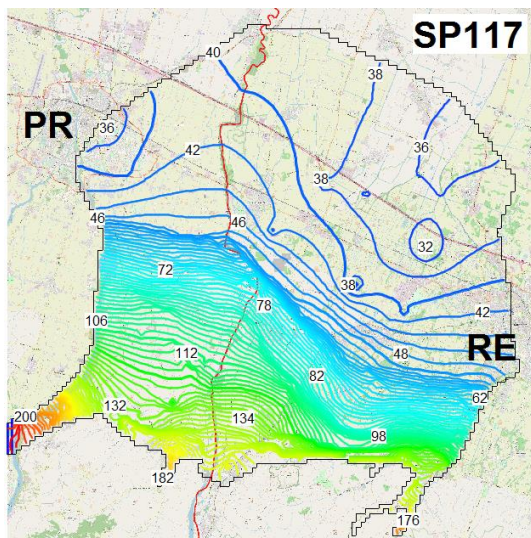

(a)

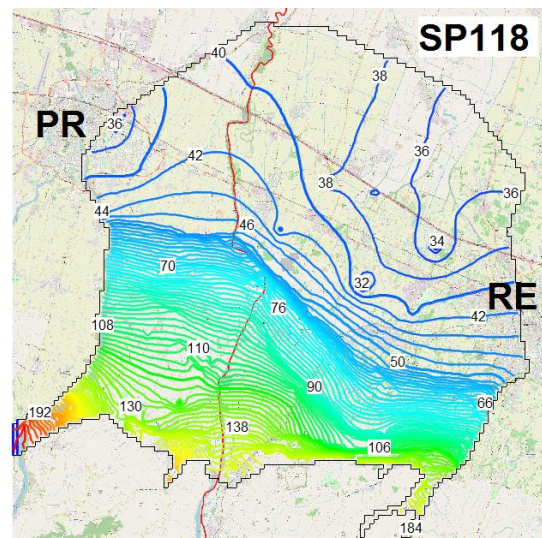

(b)

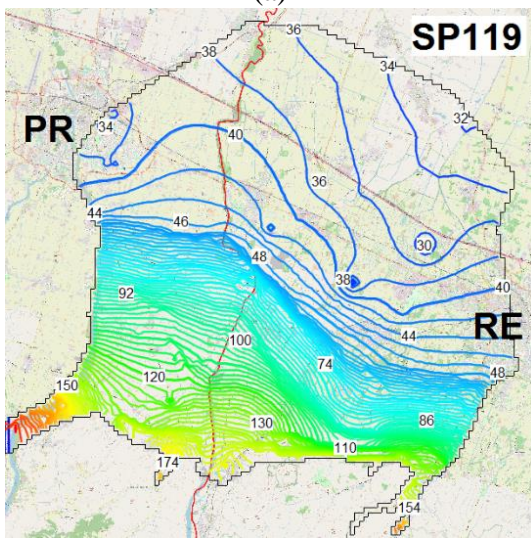

(c)

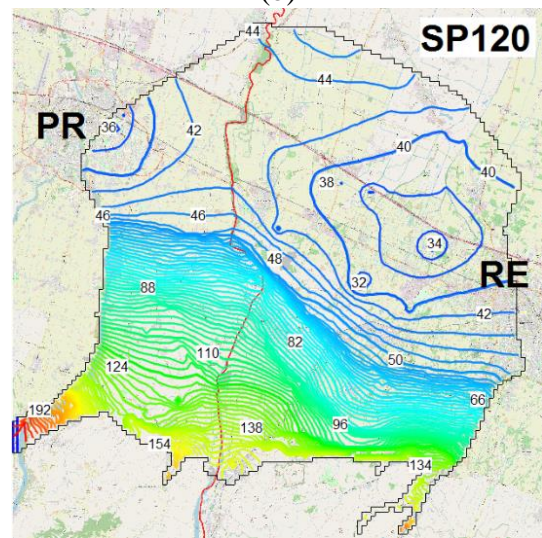

(d)

**Fig. S19** (a) – (d) Hydraulic head within layer 1, ST1 scenario, last year of simulation (2049)

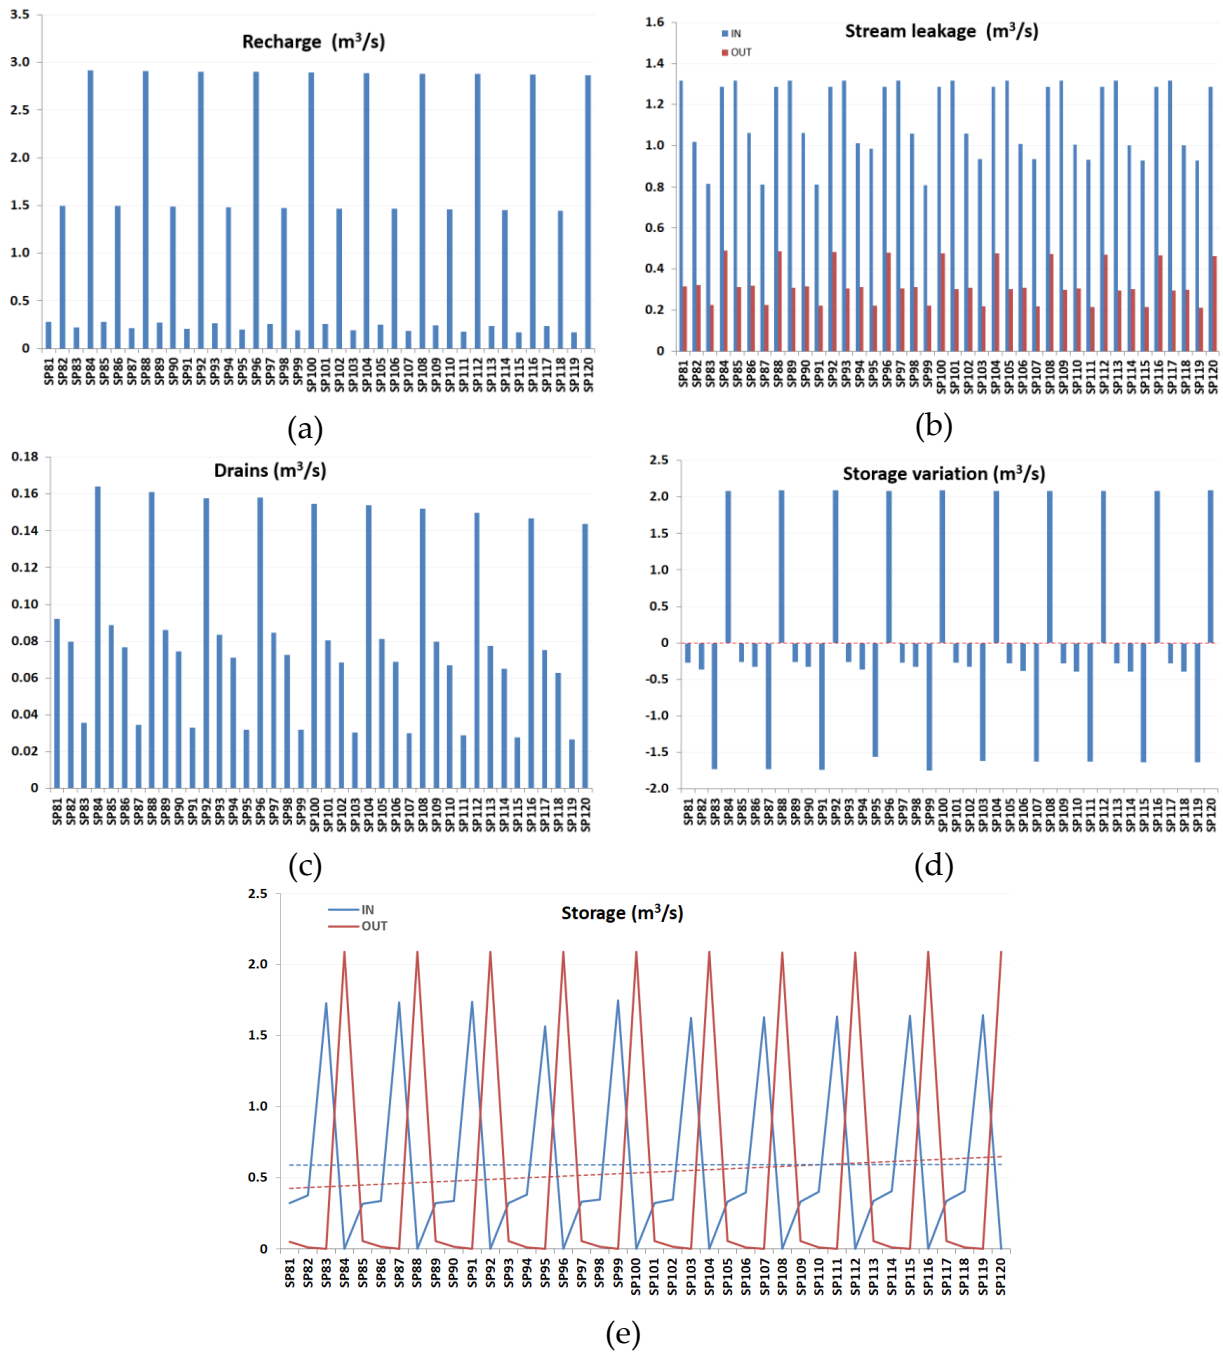

**Fig. S20** (a) – (e) Volumetric budget, derived by ST1 model: Recharge, Stream leakage In/Out, Drains, Storage variation, and Storage In/Out.



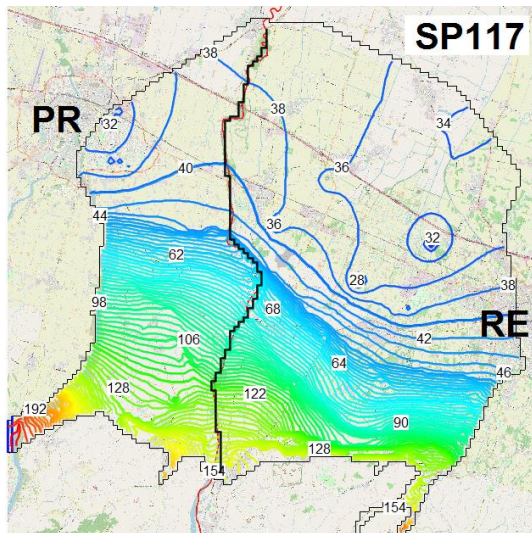

(a)

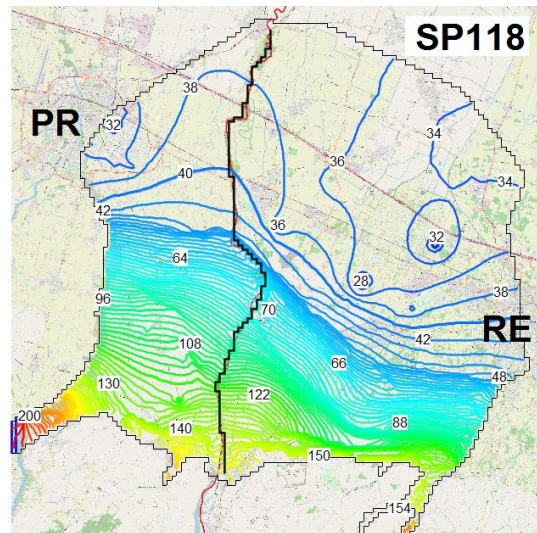

(b)

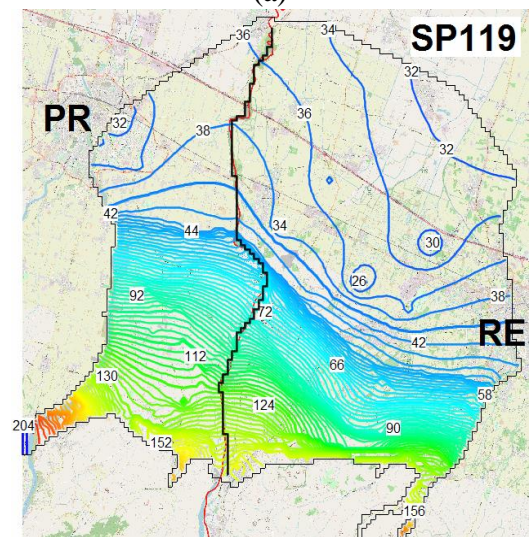

(c)

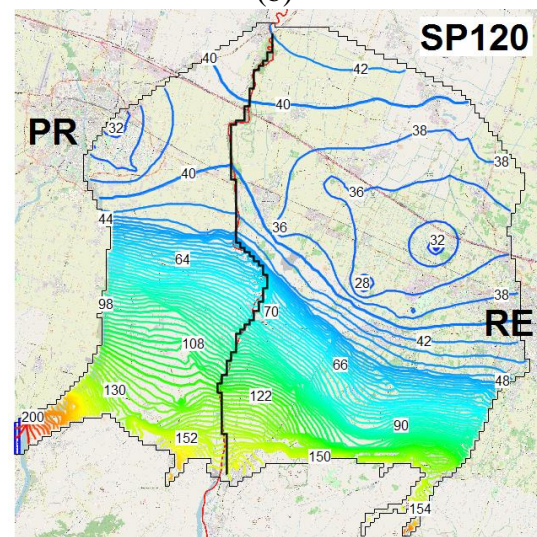

(d)

**Fig. S21** (a) – (d) Hydraulic head within layer 1, ST2 scenario, last year of simulation (2049)

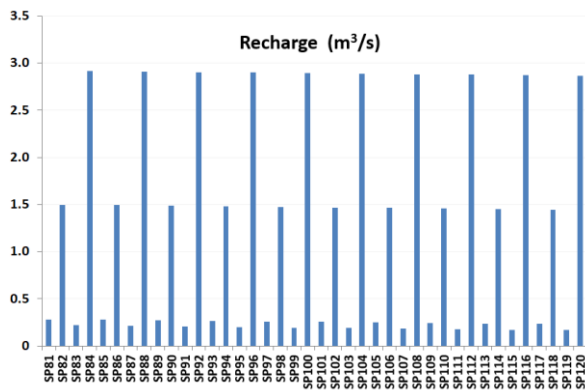

(a)

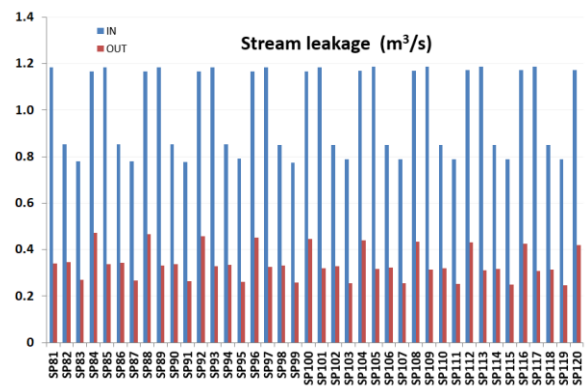

(b)

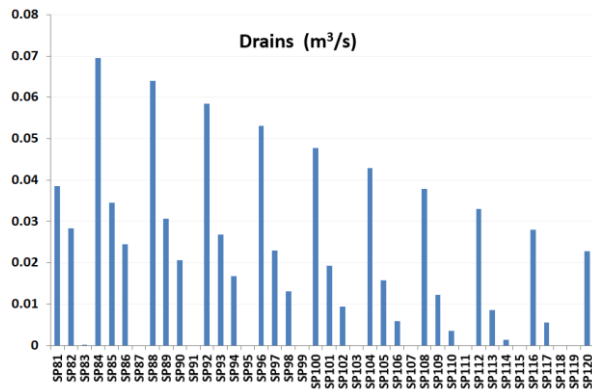

(c)

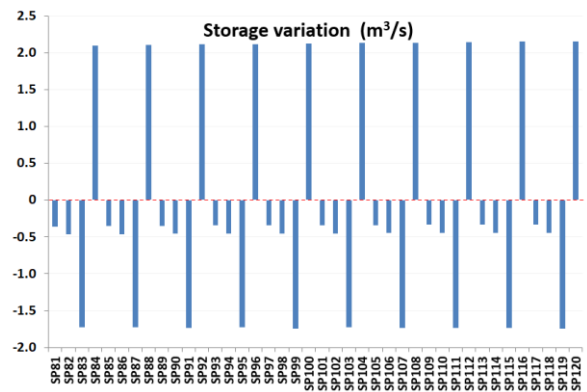

(d)

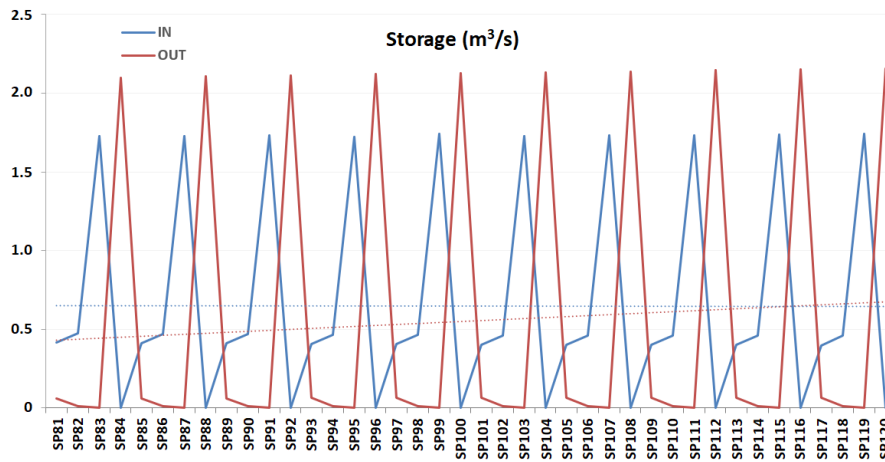

(e)

**Fig. S22** (a) – (e) Volumetric budget, derived by ST2 model: Recharge, Stream leakage In/Out, Drains, Storage variation, and Storage In/Out.

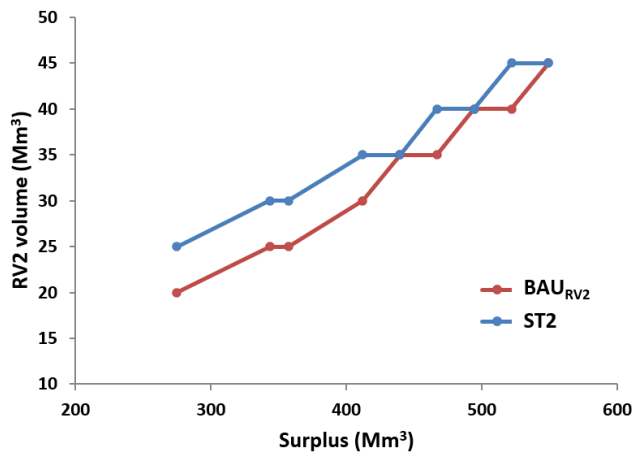

**Fig. S23** RV2 volume able to satisfy a given irrigation/industrial Surplus for Aquator scenarios BAURV2 and ST2.

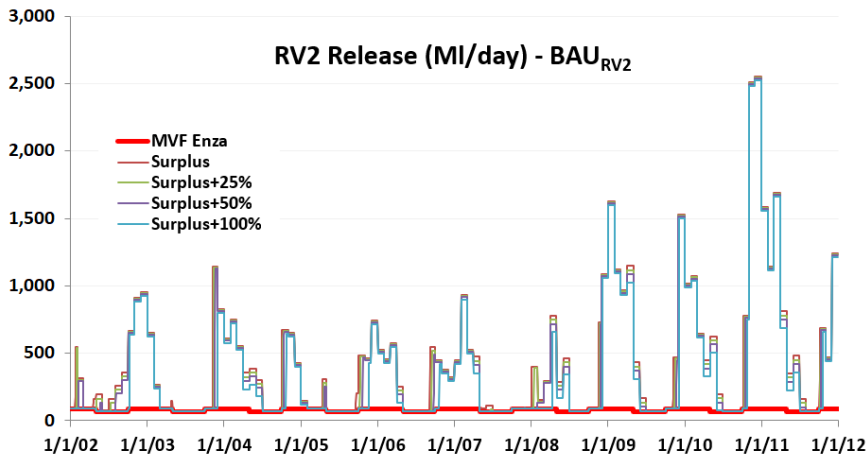

(a)

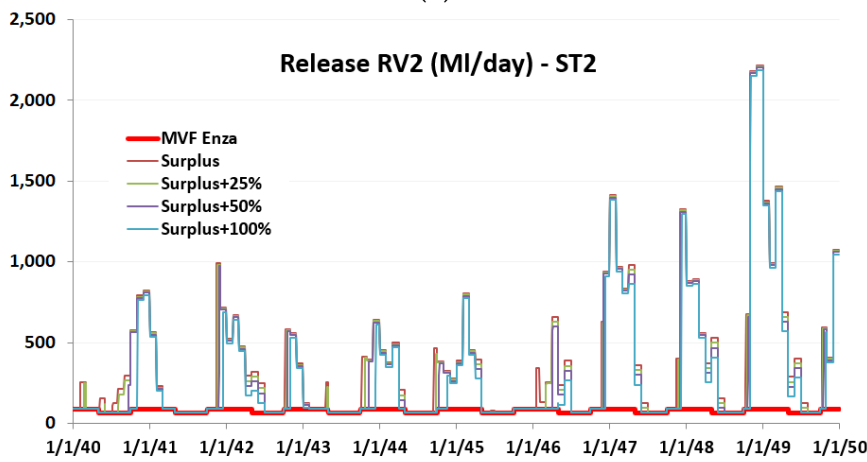

(b)

**Fig. S24** Release from RV2 reservoir in scenario  $BAU_{RV2}$  (a) and ST2 (b)

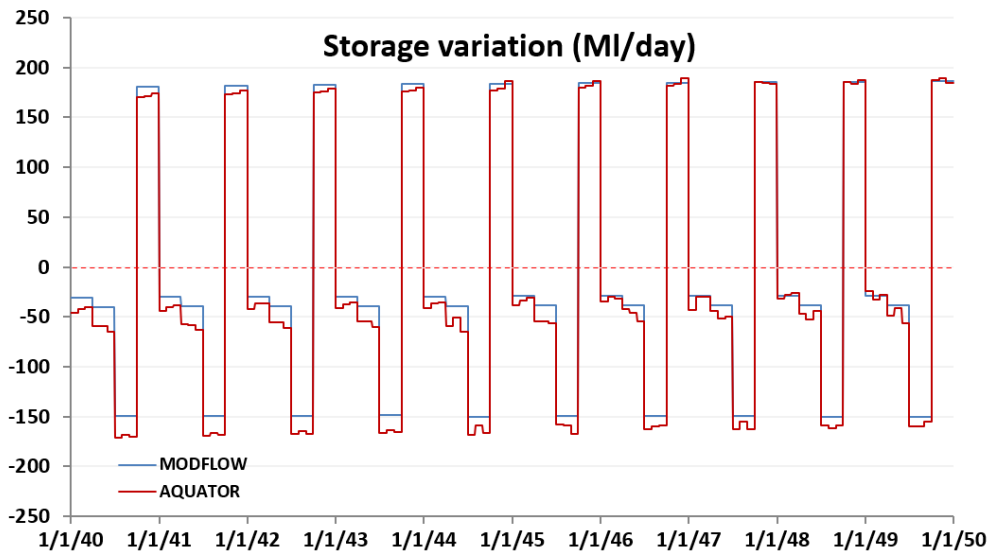

**Fig. S25** Enza storage variation in MODFLOW and Aquator models, for ST2
